# Supplementary material for: Comparative Analysis of Transcriptome and sRNAs Expression Patterns in the Brachypodium distachyon—Magnaporthe oryzae Pathosystems
Source: MDPI journal article supplement (doi:10.3390/ijms22020650), 2021-01-11
Supplement: s1 [file s1]

**Supplementary Table 1. Domain structures and coordinates (with corresponding pvalues in brackets) of MoAGOs and MoDCLs as detected by SMART+PFAM search.**

| <b>Protein</b> | <b>N domain</b>      | <b>DUF1785</b>        | <b>PAZ</b>           | <b>L2</b>            | <b>PIWI</b>            |
|----------------|----------------------|-----------------------|----------------------|----------------------|------------------------|
| <b>MoAGO1</b>  | 150-287<br>(8.2e-16) | 296-354<br>(5.54e-10) | 392-515<br>(1.5e-15) | 524-570<br>(4.3e-14) | 672-970<br>(9.69e-100) |
| <b>MoAGO2</b>  | 56-200<br>(3.6e-19)  | 211-283<br>(4.36e-17) | 352-439<br>(1.9e-9)  | 448-497<br>(9.7e-10) | 606-969<br>(6.62e-84)  |
| <b>MoAGO3</b>  | 172-314<br>(2.3e-14) | 328-383<br>(5.09e-9)  | 387-534<br>(4.1e-8)  | 543-592<br>(8.8e-15) | 702-1020<br>(1.4e-96)  |

  

| <b>Protein</b> | <b>DEXDc</b>          | <b>HELICc</b>        | <b>Dicer_dimer</b>   | <b>RIBOc</b>           | <b>RIBOc</b>            |
|----------------|-----------------------|----------------------|----------------------|------------------------|-------------------------|
| <b>MoDCL1</b>  | 104-317<br>(6.29e-19) | 436-565<br>(4.3e-19) | 639-726<br>(8.4e-20) | 1083-1190<br>(3.4e-19) | 1258-1429<br>(4.73e-20) |
| <b>MoDCL2</b>  | 61-262<br>(3.17e-15)  | 415-541<br>(9.7e-18) | 609-709<br>(4e-22)   | 1004-1142<br>(2.3e-14) | 1183-1381<br>(3.99e-18) |

**Supplementary Table 2. MoAGOs and MoDCLs protein localization prediction results by PSI.** Scores range from 0 to 1 and represent the likelihood of detecting the protein in the identified sublocalization, with corresponding pvalues.

| <b>Protein</b>        | <b>Name</b> | <b>Gene</b> | <b>Sublocalization</b> | <b>Score</b> | <b>pvalue</b> |
|-----------------------|-------------|-------------|------------------------|--------------|---------------|
| <b>XP_003714515.1</b> | MoDCL1      | MGG_01541   | Nuclear                | 0.799        | 0             |
| <b>XP_003715365.1</b> | MoDCL2      | MGG_12357   | Cytosol                | 0.565        | 0             |
| <b>XP_003716704.1</b> | MoAGO1      | MGG_14873   | Nuclear                | 0.556        | 1.7435e-227   |
|                       |             |             | Cytosol                | 0.329        | 1.5233e-100   |
| <b>XP_003717504.1</b> | MoAGO2      | MGG_13617   | Cytosol                | 0.516        | 0             |
|                       |             |             | Plastid                | 0.236        | 2.5706e-294   |
| <b>XP_003714217.1</b> | MoAGO3      | MGG_01294   | Nuclear                | 0.747        | 0             |

**Supplementary Table 3. Prediction of protein interactome for MoDCLs and MoAGOs with STRING.**

The score is the combination of experimental and co-expression scores from STRING prediction.

| <b>Interacting protein</b> | <b>Protein description</b>      | <b>DCL1 score</b> | <b>DCL2 score</b> |
|----------------------------|---------------------------------|-------------------|-------------------|
| <b>MGG_01294</b>           | Argonaute 3                     | 0.664             | 0.517             |
| <b>MGG_04429</b>           | ATP-dependent DNA helicase MPH1 | 0.515             | 0.515             |
| <b>MGG_11029</b>           | Argonaute 1                     | 0.664             | 0.512             |
| <b>MGG_13617</b>           | Argonaute 2                     | 0.664             | 0.512             |
| <b>MGG_02598</b>           | 30S ribosomal protein S16       | 0.463             | 0.463             |
| <b>MGG_09464</b>           | Uncharacterized protein         | 0.457             | 0.457             |
| <b>MGG_06727</b>           | WD domain-containing protein    | 0.45              | 0.45              |
| <b>MGG_06468</b>           | Uncharacterized protein         | 0.439             | 0.439             |

|                            |                                              |                   |                   |                   |
|----------------------------|----------------------------------------------|-------------------|-------------------|-------------------|
| <b>MGG_09301</b>           | Uncharacterized protein                      | 0.416             | 0.416             |                   |
| <b>MGG_04741</b>           | Small nuclear ribonucleoprotein Sm D1        | 0.503             |                   |                   |
| <b>MGG_09464</b>           | Uncharacterized protein                      | 0.457             |                   |                   |
| <b>MGG_07168</b>           | Uncharacterized protein                      |                   |                   | 0.551             |
|                            |                                              |                   |                   |                   |
| <b>Interacting protein</b> | <b>Protein description</b>                   | <b>AGO1 score</b> | <b>AGO2 score</b> | <b>AGO3 score</b> |
| <b>DCL1</b>                | Dicer-like protein 1                         | 0.664             | 0.664             | 0.664             |
| <b>DCL2</b>                | Dicer-like protein 2                         | 0.512             | 0.512             | 0.517             |
| <b>MGG_13500</b>           | U5 small nuclear ribonucleoprotein component | 0.685             | 0.506             | 0.506             |
| <b>MGG_06309</b>           | Cell cycle control protein cwf14             | 0.685             | 0.506             | 0.506             |
| <b>MGG_05172</b>           | Uncharacterized protein                      | 0.688             |                   |                   |
| <b>MGG_03158</b>           | Pumilio-family RNA binding repeat protein    | 0.656             |                   |                   |
| <b>MGG_02762</b>           | ATP-dependent RNA helicase DED1              | 0.64              |                   |                   |
| <b>MGG_13651</b>           | High-affinity glucose transporter            | 0.614             |                   |                   |
| <b>MGG_06873</b>           | Uncharacterized protein                      | 0.611             |                   |                   |
| <b>MGG_13734</b>           | Uncharacterized protein                      | 0.611             |                   |                   |
| <b>MGG_15299</b>           | Uncharacterized protein                      | 0.611             |                   |                   |

[illegible]

|                |        |       |        |        |       |        |        |      |        |
|----------------|--------|-------|--------|--------|-------|--------|--------|------|--------|
| <b>BdDCL3b</b> | 123.58 | -0.11 | 0.9999 | 136.99 | -0.69 | 0.0179 | 193.75 | 0.08 | 0.9998 |
| <b>BdDCL4</b>  | #N/A   | #N/A  | #N/A   | #N/A   | #N/A  | #N/A   | #N/A   | #N/A | #N/A   |
| <b>MoAGO1</b>  | 1.43   | -0.60 | 0.8495 | 7.83   | -1.91 | 0.1300 | 0.84   | 0.96 | 0.8336 |
| <b>MoAGO2</b>  | 1.42   | -0.60 | 0.8560 | 8.92   | -1.13 | 0.3495 | 2.67   | 1.93 | 0.4623 |
| <b>MoAGO3</b>  | 74.63  | -0.09 | 0.9116 | 425.73 | 0.69  | 0.0035 | 65.21  | 0.99 | 0.1353 |
| <b>MoDCL1</b>  | 0.67   | 0.49  | NA     | 3.70   | -1.81 | 0.3272 | 0.40   | 2.03 | NA     |
| <b>MoDCL2</b>  | 13.13  | 0.01  | 0.9954 | 69.69  | 0.54  | 0.2343 | 7.53   | 0.49 | 0.8699 |

**Supplementary Table 5. Selection of significantly enriched Bd GO terms from 2 DPI, 4 DPI and root Bd DEG datasets.** GO terms and GOE analysis was done with AgriGO v2 against the pre-compiled Bd reference, after transforming Bd21-3 IDs to Bd21 ones. Abbreviations: O= ontology, P= biological process, F = molecular function, C = cellular component, BG = background, FDR = false discovery rate.

| Setup | GO term    | O | Description                                  | Input list | BG/Ref | p-value     | FDR        |
|-------|------------|---|----------------------------------------------|------------|--------|-------------|------------|
| 4 DPI | GO:1901564 | P | organonitrogen compound metabolic process    | 280        | 846    | 6.3E-16     | 1.7E-12    |
| 4 DPI | GO:1901566 | P | organonitrogen compound biosynthetic process | 219        | 668    | 2.6E-12     | 3.5E-09    |
| 4 DPI | GO:0006412 | P | translation                                  | 156        | 451    | 1.9E-10     | 0.00000015 |
| 4 DPI | GO:0043603 | P | cellular amide metabolic process             | 160        | 468    | 2.2E-10     | 0.00000015 |
| 4 DPI | GO:0043043 | P | peptide biosynthetic process                 | 156        | 455    | 3.2E-10     | 0.00000015 |
| 4 DPI | GO:0006518 | P | peptide metabolic process                    | 158        | 465    | 4.2E-10     | 0.00000016 |
| 4 DPI | GO:0008152 | P | metabolic process                            | 1534       | 7223   | 2.5E-09     | 0.00000074 |
| 4 DPI | GO:0006082 | P | organic acid metabolic process               | 120        | 358    | 0.000000099 | 0.000027   |
| 4 DPI | GO:0044281 | P | small molecule metabolic process             | 170        | 572    | 0.000000022 | 0.000054   |
| 4 DPI | GO:0043436 | P | oxoacid metabolic process                    | 105        | 322    | 0.000000017 | 0.00039    |
| 4 DPI | GO:0044699 | P | single-organism process                      | 664        | 2940   | 0.000000024 | 0.00048    |
| 4 DPI | GO:0055114 | P | oxidation-reduction process                  | 287        | 1159   | 0.0000017   | 0.003      |
| 4 DPI | GO:0044267 | P | cellular protein metabolic process           | 483        | 2165   | 0.000023    | 0.036      |
| 4 DPI | GO:0003735 | F | structural constituent of ribosome           | 127        | 312    | 2.3E-12     | 1.7E-09    |
| 4 DPI | GO:0005198 | F | structural molecule activity                 | 133        | 330    | 1.2E-12     | 1.7E-09    |
| 4 DPI | GO:0003824 | F | catalytic activity                           | 1408       | 6501   | 2.4E-10     | 0.00000012 |
| 4 DPI | GO:0016491 | F | oxidoreductase activity                      | 318        | 1274   | 0.000000032 | 0.0012     |
| 4 DPI | GO:0035639 | F | purine ribonucleoside triphosphate binding   | 376        | 1608   | 0.000006    | 0.015      |
| 4 DPI | GO:0005737 | C | cytoplasm                                    | 239        | 793    | 2.3E-10     | 0.00000003 |
| 4 DPI | GO:0043228 | C | non-membrane-bounded organelle               | 156        | 547    | 0.00000005  | 0.00038    |
| 2 DPI | GO:0055114 | P | oxidation-reduction process                  | 30         | 1159   | 5.70E-08    | 2.10E-05   |
| 2 DPI | GO:0044710 | P | single-organism metabolic process            | 40         | 1966   | 1.40E-07    | 2.50E-05   |

|              |            |   |                                                         |    |      |          |          |
|--------------|------------|---|---------------------------------------------------------|----|------|----------|----------|
| <b>2 DPI</b> | GO:0044699 | P | single-organism process                                 | 46 | 2940 | 1.90E-05 | 0.0023   |
| <b>2 DPI</b> | GO:0005506 | F | iron ion binding                                        | 20 | 313  | 7.20E-12 | 1.50E-09 |
| <b>2 DPI</b> | GO:0016705 | F | oxidoreductase activity, acting on paired donors        | 19 | 301  | 3.10E-11 | 3.10E-09 |
| <b>2 DPI</b> | GO:0020037 | F | heme binding                                            | 21 | 438  | 3.30E-10 | 2.20E-08 |
| <b>2 DPI</b> | GO:0003824 | F | catalytic activity                                      | 91 | 6501 | 5.70E-10 | 2.30E-08 |
| <b>2 DPI</b> | GO:0046906 | F | tetrapyrrole binding                                    | 21 | 452  | 5.70E-10 | 2.30E-08 |
| <b>2 DPI</b> | GO:0016491 | F | oxidoreductase activity                                 | 30 | 1274 | 4.30E-07 | 1.40E-05 |
| <b>2 DPI</b> | GO:0043167 | F | ion binding                                             | 31 | 1701 | 4.70E-05 | 0.0014   |
| <b>2 DPI</b> | GO:0043169 | F | cation binding                                          | 29 | 1601 | 9.90E-05 | 0.002    |
| <b>Root</b>  | GO:0006979 | P | response to oxidative stress                            | 8  | 169  | 4.80E-06 | 0.00087  |
| <b>Root</b>  | GO:0044710 | P | single-organism metabolic process                       | 25 | 1966 | 2.70E-05 | 0.001    |
| <b>Root</b>  | GO:0044264 | P | cellular polysaccharide metabolic process               | 5  | 61   | 2.70E-05 | 0.001    |
| <b>Root</b>  | GO:0006950 | P | response to stress                                      | 11 | 473  | 5.30E-05 | 0.0016   |
| <b>Root</b>  | GO:0005976 | P | polysaccharide metabolic process                        | 5  | 73   | 6.20E-05 | 0.0016   |
| <b>Root</b>  | GO:0055114 | P | oxidation-reduction process                             | 17 | 1159 | 0.00014  | 0.0032   |
| <b>Root</b>  | GO:0044262 | P | cellular carbohydrate metabolic process                 | 5  | 108  | 0.00035  | 0.0071   |
| <b>Root</b>  | GO:0016684 | F | oxidoreductase activity, acting on peroxide as acceptor | 8  | 174  | 5.90E-06 | 0.00029  |
| <b>Root</b>  | GO:0020037 | F | heme binding                                            | 12 | 438  | 4.70E-06 | 0.00029  |
| <b>Root</b>  | GO:0003824 | F | catalytic activity                                      | 56 | 6501 | 2.40E-06 | 0.00029  |
| <b>Root</b>  | GO:0046906 | F | tetrapyrrole binding                                    | 12 | 452  | 6.50E-06 | 0.00029  |
| <b>Root</b>  | GO:0004601 | F | peroxidase activity                                     | 8  | 171  | 5.20E-06 | 0.00029  |
| <b>Root</b>  | GO:0016830 | F | carbon-carbon lyase activity                            | 5  | 72   | 5.80E-05 | 0.0019   |
| <b>Root</b>  | GO:0016491 | F | oxidoreductase activity                                 | 18 | 1274 | 0.00014  | 0.0039   |
| <b>Root</b>  | GO:0016829 | F | lyase activity                                          | 6  | 174  | 0.00041  | 0.01     |
| <b>Root</b>  | GO:0016798 | F | hydrolase activity, acting on glycosyl bonds            | 8  | 371  | 0.00097  | 0.022    |

**Supplementary Table 6. Selection of significantly enriched Mo GO terms from 2 DPI, 4 DPI and root Mo DEG datasets.** GO terms and GOE analysis was done with AgriGO v2 against the pre-compiled Mo reference. Abbreviations: P= biological process, F = molecular function, C = cellular component, BG = background, FDR = false discovery rate.

| Setup | GO term    | O | Description                                                                         | Input list | BG/Ref | p-value   | FDR        |
|-------|------------|---|-------------------------------------------------------------------------------------|------------|--------|-----------|------------|
| Root  | GO:0044408 | P | growth or development of symbiont on or near host                                   | 198        | 1478   | 1.8E-09   | 0.00000065 |
| Root  | GO:0006412 | P | translation                                                                         | 28         | 112    | 0.0000047 | 0.000086   |
| Root  | GO:0052047 | P | interaction with other organism via secreted substance during symbiotic interaction | 19         | 69     | 0.000052  | 0.0038     |
| Root  | GO:0044046 | P | interaction with host via substance released outside of symbiont                    | 19         | 69     | 0.000052  | 0.0038     |
| Root  | GO:0052048 | P | interaction with host via secreted substance during symbiotic interaction           | 19         | 69     | 0.000052  | 0.0038     |
| Root  | GO:0052051 | P | interaction with host via protein secreted by type II secretion system              | 18         | 68     | 0.00012   | 0.0066     |
| Root  | GO:0052211 | P | interaction with other organism via protein secreted by type II secretion system    | 18         | 68     | 0.00012   | 0.0066     |
| Root  | GO:0051701 | P | interaction with host                                                               | 19         | 81     | 0.00031   | 0.014      |
| Root  | GO:0003735 | F | structural constituent of ribosome                                                  | 17         | 65     | 0.00022   | 0.024      |
| Root  | GO:0005198 | F | structural molecule activity                                                        | 17         | 71     | 0.00052   | 0.028      |
| 2 DPI | GO:0032502 | P | developmental process                                                               | 263        | 1048   | 8.50E-07  | 0.00066    |
| 2 DPI | GO:0048856 | P | anatomical structure development                                                    | 245        | 989    | 4.80E-06  | 0.0019     |
| 2 DPI | GO:0032501 | P | multicellular organismal process                                                    | 233        | 951    | 1.60E-05  | 0.0031     |
| 2 DPI | GO:0007275 | P | multicellular organismal development                                                | 233        | 950    | 1.50E-05  | 0.0031     |
| 2 DPI | GO:0043581 | P | mycelium development                                                                | 230        | 941    | 2.10E-05  | 0.0033     |
| 2 DPI | GO:0034641 | P | cellular nitrogen compound metabolic process                                        | 38         | 90     | 2.80E-05  | 0.0037     |
| 4 DPI | GO:0044408 | P | growth or development of symbiont on or near host                                   | 521        | 1478   | 1.80E-08  | 1.50E-05   |

**Supplementary Table 7. Overview of total sRNA and mRNA reads in the *Brachypodium distachyon* – *Magnaporthe oryzae* interaction.** Total (tot.) reads sRNA: total number of raw sRNA reads per sample. Total sRNA reads Bd/ Total sRNA reads Mo: total number of sRNA reads aligned without mismatches to organism of origin genome that have at least 2 mismatches to the interacting organism genome. Total reads mRNA: total number of raw mRNA reads per sample.

| <b>Sample</b>                       | <b>Tot. reads<br/>sRNA</b> | <b>Tot. sRNA<br/>reads <i>Bd</i></b> | <b>Tot. sRNA<br/>reads <i>Mo</i></b> | <b>Tot. mRNA<br/>reads<br/>(millions)</b> |
|-------------------------------------|----------------------------|--------------------------------------|--------------------------------------|-------------------------------------------|
| <b>2 DPI leaves con</b>             | 28 435 036                 | 18 691 859                           |                                      | 59.5                                      |
| <b>2 DPI leaves <i>Mo</i></b>       | 35 544 788                 | 25 844 498                           | 62 709                               | 59.3                                      |
| <b>4 DPI leaves con</b>             | 21 846 438                 | 15 214 694                           |                                      | 105                                       |
| <b>4 DPI leaves <i>Mo</i></b>       | 26 376 527                 | 15 623 561                           | 827 678                              | 82.8                                      |
| <b>Roots con</b>                    | 33 722 475                 | 23 139 570                           |                                      | 47.8                                      |
| <b>Roots <i>Mo</i></b>              | 37 697 368                 | 26 378 677                           | 96 506                               | 44.9                                      |
| <b>Axenic culture<br/><i>Mo</i></b> | 26 407 359                 |                                      | 13 721 649                           | 65                                        |
